# Supplementary material for: MicroRNA expression in pre-treatment plasma of patients with benign breast diseases and breast cancer
Source: PubMed Central journal article supplement (PMC5966243; doi:10.18632/oncotarget.25262), 2018-05-11
Supplement: oncotarget-09-24335-s001.pdf [file oncotarget-09-24335-s001.pdf]

## MicroRNA expression in pre-treatment plasma of patients with benign breast diseases and breast cancer

### SUPPLEMENTARY MATERIALS

**Supplementary Table 1: Expression levels of 30 miRs in the discovery cohort.** See Supplementary\_Table 1

**Supplementary Table 2: Overview of literature for literature-based miRs.** See Supplementary\_Table 2

**Supplementary Table 3: Subgroups in the discovery cohort based on pooled samples**

| Pooled samples                                                                           | Pool | Clinical group                                                   |
|------------------------------------------------------------------------------------------|------|------------------------------------------------------------------|
| Benign, papiloma                                                                         | 1    | A = wildtype BRCA1 benign<br>Group A consists of pool 1 + 2 + 3. |
| Benign, fibroadenoma (aged ≤50 years)                                                    | 2    |                                                                  |
| Benign (aged > 50 years)                                                                 | 3    |                                                                  |
| Benign samples of BRCA1 mutation carriers                                                | 4    | B = mutant BRCA1 benign (pool 4)                                 |
| Malignant, N0, HR positive, Her2Neu negative, and chemotherapy naïve                     | 5    | tC = malignant                                                   |
| Malignant, N0/N1, HR negative and Her2Neu negative                                       | 6    |                                                                  |
| Malignant, T2-T4, HR positive, Her2Neu negative with chemotherapy (aged ≤50 years)       | 7    |                                                                  |
| Malignant, T2-T4, HR positive. Her2Neu negative and chemotherapy naïve (aged >50years)   | 8    |                                                                  |
| Malignant, HR positive and Her2Neu positive                                              | 9    |                                                                  |
| Metastatic breast cancer, T1a-T1b, N0, HR positive and Her2Neu negative (aged ≤50 years) | 10   |                                                                  |
| Metastatic breast cancer, N+, HR positive and Her2Neu negative (aged > 50 years)         | 11   |                                                                  |
| Metastatic breast cancer, HR negative and Her2Neu negative                               | 12   |                                                                  |

‘N’ = nodal stage. ‘HR’ = hormonal receptor status. ‘Her2Neu’ = Her2Neu receptor status.

**Supplementary Table 4: GeNorm and NormFinder results for the discovery ( $n = 29$ ) and validation ( $n = 79$ ) samples**

| GeNorm                                                   |         | NormFinder                |       | intergroup variation |                          | intragroup variation |                          |
|----------------------------------------------------------|---------|---------------------------|-------|----------------------|--------------------------|----------------------|--------------------------|
|                                                          |         |                           |       | benign               | malignant+<br>metastatic | benign               | malignant+<br>metastatic |
| Gene name                                                | M-Value | Gene name                 | SD    | SD                   | SD                       | SD                   |                          |
| <b>Discovery Phase micro-array [<math>n = 29</math>]</b> |         |                           |       |                      |                          |                      |                          |
| <i>hsa-miR-125a-5p</i>                                   | 0.51    | <i>hsa-miR-125a-5p</i>    | -0.18 | 0.18                 | 0.26                     | 0.07                 |                          |
| <i>hsa-miR-197-3p</i>                                    | 0.34    | <i>hsa-miR-197-3p</i>     | -0.16 | 0.16                 | 0.10                     | 0.02                 |                          |
| <i>hsa-miR-326</i>                                       | 0.43    | <i>hsa-miR-326</i>        | -0.26 | 0.26                 | 0.06                     | 0.15                 |                          |
| <i>hsa-miR-423-5p</i>                                    | 0.42    | <i>hsa-miR-423-5p</i>     | 0.08  | -0.08                | 0.24                     | 0.18                 |                          |
| <i>hsa-miR-532-3p</i>                                    | 0.34    | <i>hsa-miR-532-3p</i>     | -0.19 | 0.19                 | 0.18                     | 0.07                 |                          |
| <i>hsa-miR-188-5p</i>                                    | 0.40    | <i>hsa-miR-188-5p</i>     | -0.01 | 0.01                 | 0.04                     | 0.01                 |                          |
| <b>Validation phase RT-qPCR [<math>n = 79</math>]</b>    |         |                           |       |                      |                          |                      |                          |
| <i>median_25miR_panel</i>                                | 0.50    | <i>median_25miR_panel</i> | 0.02  | -0.02                | 0.08                     | 0.05                 |                          |
| <i>median_5miR_panel</i>                                 | 0.60    | <i>median_5miR_panel</i>  | -0.06 | 0.06                 | 0.30                     | 0.25                 |                          |
| <i>Cq_miR_103</i>                                        | 0.47    | <i>Cq_miR_103</i>         | 0.14  | -0.14                | 0.25                     | 0.39                 |                          |
| <i>Cq_miR_107</i>                                        | 0.47    | <i>Cq_miR_107</i>         | 0.10  | -0.10                | 0.18                     | 0.29                 |                          |
| <i>Cq_miR_423_5p</i>                                     | 0.51    | <i>Cq_miR_423_5p</i>      | 0.14  | -0.14                | 0.30                     | 0.24                 |                          |
| <i>Cq_miR_142_3p_24</i>                                  | 0.52    | <i>Cq_miR_142_3p_24</i>   | 0.04  | -0.04                | 0.19                     | 0.21                 |                          |
| <i>Cq_miR_185</i>                                        | 0.54    | <i>Cq_miR_185</i>         | 0.13  | -0.13                | 0.06                     | 0.36                 |                          |
| <i>Cq_miR_21</i>                                         | 0.56    | <i>Cq_miR_21</i>          | 0.02  | -0.02                | 0.14                     | 0.09                 |                          |
| <i>Cq_miR_191</i>                                        | 0.58    | <i>Cq_miR_191</i>         | 0.10  | -0.10                | 0.44                     | 0.30                 |                          |
| <i>Cq_miR_532_3p</i>                                     | 0.59    | <i>Cq_miR_532_3p</i>      | -0.03 | 0.03                 | 0.23                     | 0.11                 |                          |
| <i>Cq_miR_197</i>                                        | 0.62    | <i>Cq_miR_197</i>         | -0.13 | 0.13                 | 0.30                     | 0.38                 |                          |
| <i>Cq_miR_195</i>                                        | 0.63    | <i>Cq_miR_195</i>         | 0.07  | -0.07                | 0.27                     | 0.11                 |                          |
| <i>Cq_miR_125a_5p</i>                                    | 0.66    | <i>Cq_miR_125a_5p</i>     | 0.04  | -0.04                | 0.52                     | 0.58                 |                          |
| <i>Cq_miR_20b</i>                                        | 0.69    | <i>Cq_miR_20b</i>         | 0.07  | -0.07                | 0.24                     | 0.63                 |                          |
| <i>Cq_miR_let7b</i>                                      | 0.73    | <i>Cq_miR_let7b</i>       | -0.25 | 0.25                 | 0.74                     | 0.48                 |                          |
| <i>Cq_miR_145</i>                                        | 0.77    | <i>Cq_miR_145</i>         | 0.00  | 0.00                 | 0.69                     | 1.14                 |                          |
| <i>Cq_miR_652_5p</i>                                     | 0.80    | <i>Cq_miR_652_5p</i>      | 0.32  | -0.32                | 0.71                     | 1.44                 |                          |
| <i>Cq_miR_29b</i>                                        | 0.84    | <i>Cq_miR_29b</i>         | 0.18  | -0.18                | 0.62                     | 1.44                 |                          |
| <i>Cq_miR_18b</i>                                        | 0.88    | <i>Cq_miR_18b</i>         | -0.09 | 0.09                 | 1.55                     | 0.69                 |                          |
| <i>Cq_miR_375</i>                                        | 0.93    | <i>Cq_miR_375</i>         | -0.10 | 0.10                 | 1.34                     | 1.37                 |                          |
| <i>Cq_miR_451</i>                                        | 0.99    | <i>Cq_miR_451</i>         | 0.11  | -0.11                | 1.63                     | 2.27                 |                          |
| <i>Cq_miR_675</i>                                        | 1.06    | <i>Cq_miR_675</i>         | -0.10 | 0.10                 | 1.76                     | 3.33                 |                          |
| <i>Cq_miR_135a*</i>                                      | 1.14    | <i>Cq_miR_135a*</i>       | -0.30 | 0.30                 | 1.87                     | 4.70                 |                          |
| <i>Cqa_miR_23a*</i>                                      | 1.24    | <i>Cqa_miR_23a*</i>       | -0.37 | 0.37                 | 2.60                     | 7.44                 |                          |
| <i>Cq_miR_202</i>                                        | 1.34    | <i>Cq_miR_202</i>         | -0.05 | 0.05                 | 1.29                     | 9.10                 |                          |
| <i>Cq_miR_326</i>                                        | 1.44    | <i>Cq_miR_326</i>         | 0.69  | -0.69                | 4.26                     | 8.51                 |                          |
| <i>Cq_miR_382star</i>                                    | 1.56    | <i>Cq_miR_382star</i>     | -0.70 | 0.70                 | 5.14                     | 12.95                |                          |

Of the 6 stable expressed miRs identified in the micro-array data all except *hsa-miR-188-5p* could be measured reliably by RT-qPCR in the validation set. As the median value of the 25 miR panel with an *M*-value of 0.50 versus 0.60 for the remaining 5-miR reference miR panel was identified as the most stable marker for our analysis, we normalized our data on the median level of all 25 miRs that could be quantified reliably.

Also when analyzed separately for benign and malignant/metastatic with NormFinder, the median of the 25 miR panel had the lowest variability.
